# Supplementary material for: Green Extraction of Polyphenols from Waste Bentonite to Produce Functional Antioxidant Excipients for Cosmetic and Pharmaceutical Purposes: A Waste-to-Market Approach
Source: MDPI journal article supplement (doi:10.3390/antiox11122493), 2022-12-19
Supplement: s1 [file s1]

## Supplementary Materials

Article

# Green extraction of polyphenols from waste bentonite to produce functional antioxidant excipients for cosmetic and pharmaceutical purposes: a waste-to-market approach

Giulia Di Prima<sup>1</sup>, Elena Belfiore<sup>2</sup>, Martina Migliore<sup>1</sup>, Amalia Giulia Scarpaci<sup>1</sup>, Giuseppe Angellotti<sup>2</sup>, Ignazio Restivo<sup>1</sup>, Mario Allegra<sup>1</sup>, Vincenzo Arizza<sup>1</sup>, and Viviana De Caro<sup>1,3\*</sup>

Data reported as supplementary material:

- **Figure S1:** A) Residual DPPH (%) as a function of incubation time when evaluating standard GA solutions at concentrations of: 0.050 mg mL<sup>-1</sup> (black), 0.035 mg mL<sup>-1</sup> (red), 0.025 mg mL<sup>-1</sup> (blue), 0.020 mg mL<sup>-1</sup> (pink) and 0.015 mg mL<sup>-1</sup> (green). B) Data in the semi-logarithmic scale and linear curve fitting (linearity range: 20-60 min) (n=3)
- **Figure S2:** Comparative antioxidant behaviors of the freshly prepared (black and red) and 6-months-old (green) extracts: residual DPPH (%) as a function of incubation time when evaluating the A) GW, B) GD, C) PW and D) PD extracts (n=6)
- **Figure S3:** 3D plot image of the PW extract: elution from 0 to 27 min.

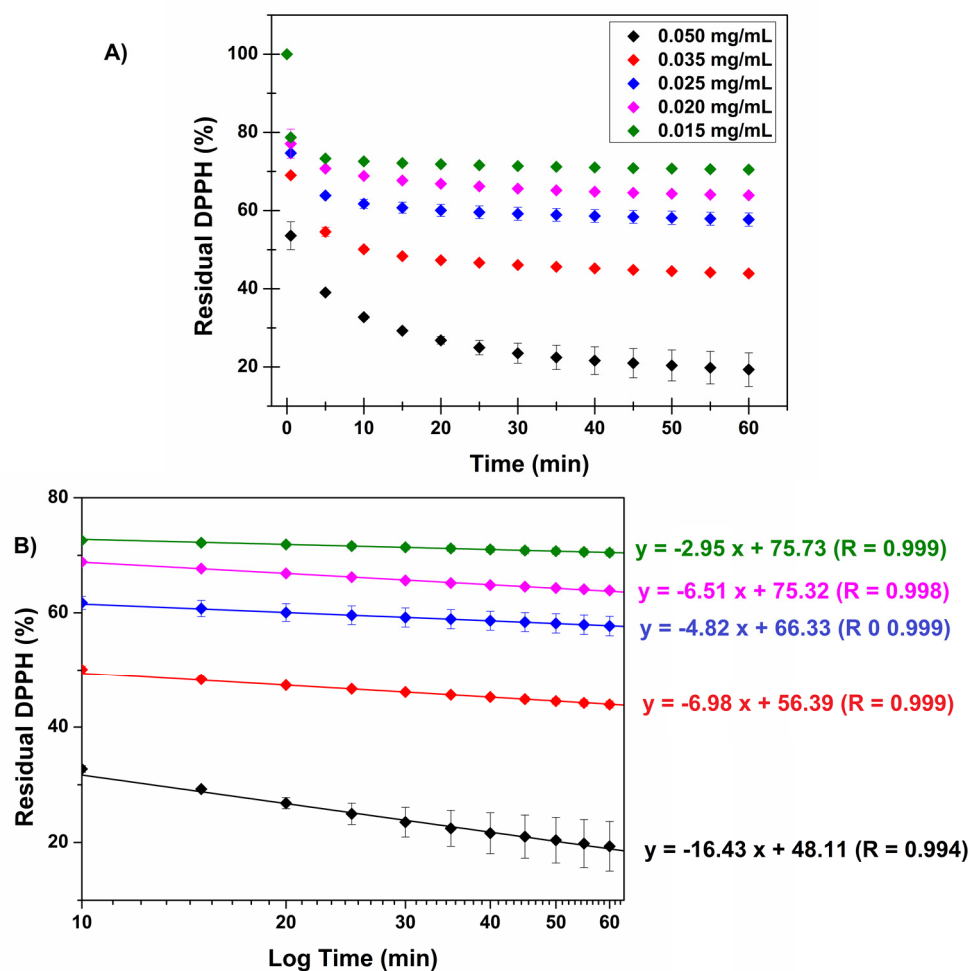

**Figure S1.** A) Residual DPPH (%) as a function of incubation time when evaluating standard GA solutions at concentrations of: 0.050 mg mL<sup>-1</sup> (black), 0.035 mg mL<sup>-1</sup> (red), 0.025 mg mL<sup>-1</sup> (blue), 0.020 mg mL<sup>-1</sup> (pink) and 0.015 mg mL<sup>-1</sup> (green). B) Data in the semi-logarithmic scale and linear curve fitting (linearity range: 20-60 min) (n=3)

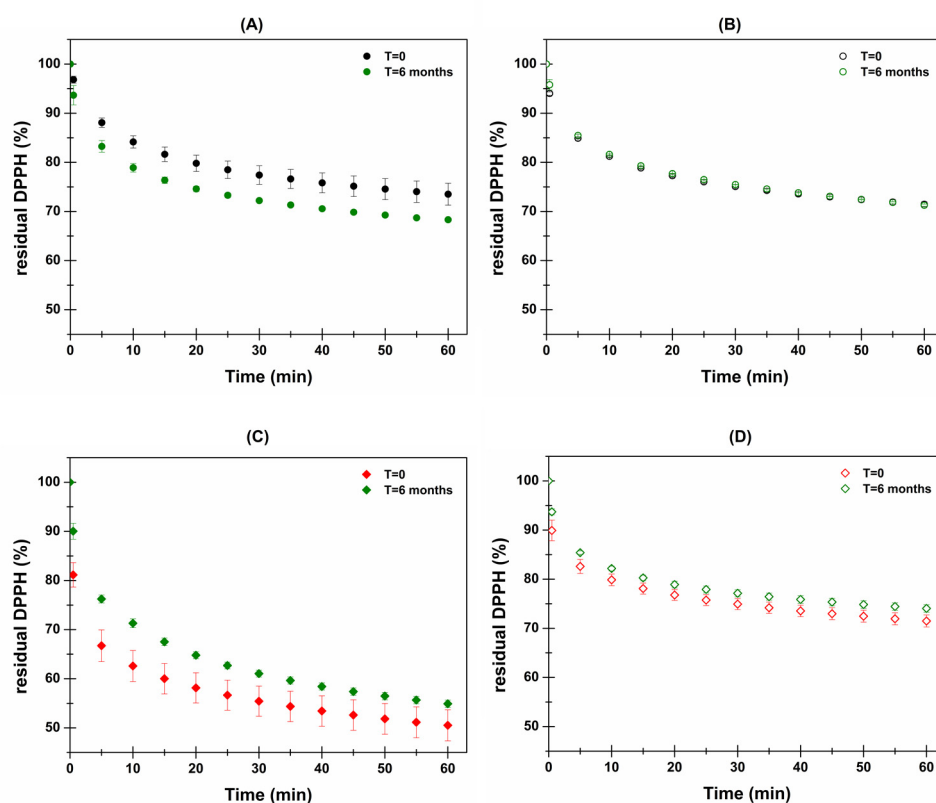

**Figure S2.** Comparative antioxidant behaviors of the freshly prepared (black and red) and 6-months-old (green) extracts: residual DPPH (%) as a function of incubation time when evaluating the A) GW, B) GD, C) PW and D) PD extracts (n=6)

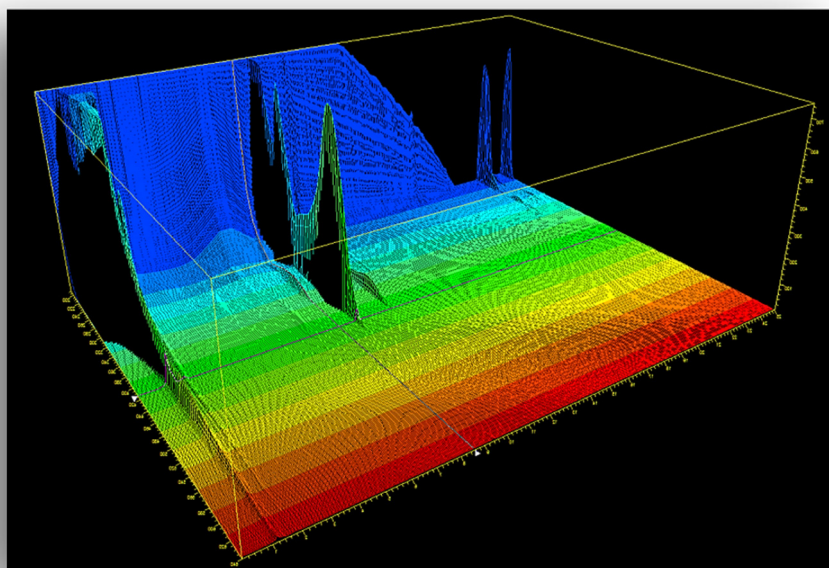

**Figure S3:** 3D image of PW extract elution from 0 to 27 min.
